# Widespread cryptic variation in genetic architecture between the sexes

Wouter van der Bijl<sup>1</sup> and Judith E. Mank<sup>1,2</sup>

<sup>1</sup> Department of Zoology and Biodiversity Research Centre, University of British Columbia, Canada

<sup>2</sup> Department of Genetics, Evolution and Environment, University College London, UK

## Abstract

The majority of the genome is shared between the sexes, and it is expected that the genetic architecture of most traits is shared as well. This common architecture has been viewed as a major source of constraint on the evolution of sexual dimorphism (SD). SD is nonetheless common in nature, leading to assumptions that it results from differential regulation of shared genetic architecture. Here, we study the effect of thousands of gene knock-out mutations on 202 mouse phenotypes to explore how regulatory variation affects SD. We show that many traits are dimorphic to some extent, and that a surprising proportion of knock-outs have sex-specific phenotypic effects. Many traits, regardless whether they are monomorphic or dimorphic, harbor cryptic differences in genetic architecture between the sexes, resulting in sexually discordant phenotypic effects from sexually concordant regulatory changes. This provides an alternative route to dimorphism through sex-specific genetic architecture, rather than differential regulation of shared architecture.

Keywords: sexual dimorphism, genetic architecture, between-sex genetic correlation, rFM, knock-out

## 20 Introduction

21 In organisms with separate sexes, different  
22 evolutionary interests of males and females can lead to  
23 divergent trait optima, which can be realized through the  
24 evolution of sexual dimorphism. For traits to change from  
25 monomorphic to dimorphic, the underlying genetic  
26 mechanisms need to be decoupled between males and  
27 females. However, even in species with sex chromosomes,  
28 males and females share the vast majority of their genome  
29 (Bachtrog *et al.*, 2014), leading to the expectation that  
30 traits are controlled by the same loci in both sexes (Lande,  
31 1980). This shared genomic architecture is typically  
32 considered a source of significant constraint on the  
33 evolution of dimorphism (Stewart & Rice, 2018), as traits  
34 would need to first become genetically decoupled  
35 between females and males before divergence can occur  
36 (Lande, 1980; Poissant *et al.*, 2010; Hermansen *et al.*,  
37 2018). Shared trait architecture can lead to intra-locus  
38 sexual conflict (Rice & Chippindale, 2001), where alleles at  
39 a locus have different fitness effects in males and females,  
40 and is this assumed to limit the degree to which the sexes  
41 can achieve their respective fitness optima (Hansen, 2006).  
42 Indeed, the constraints on the evolution of sexual  
43 dimorphism (SD) are often considered both pervasive and  
44 persistent, resulting in enduring sexually antagonistic  
45 selection on many traits (Rice & Chippindale, 2001;  
46 Chenoweth *et al.*, 2008; Poissant *et al.*, 2010; Ruzicka *et*  
47 *al.*, 2019). This persistent constraint is however difficult to  
48 reconcile with the fact that sexual dimorphism evolves  
49 rapidly (Stewart & Rice, 2018), is seen in a broad array of  
50 traits, and differs markedly among related species (Owens  
51 & Hartley, 1998).

52 It has been suggested that sexual dimorphism arises  
53 from regulatory differences between males and females  
54 (Ellegren & Parsch, 2007; Mank, 2017), and there are good

55 examples of this (e.g. Galouzis & Prud'homme, 2021).  
56 Indeed, recent genome-wide scans in fruit flies have  
57 shown that protein coding sequence differences are  
58 overrepresented among evolutionarily persistent variants  
59 thought to be maintained by sexual antagonism (Ruzicka  
60 *et al.*, 2019). This might suggest that conflict over coding  
61 sequence variation is much harder to resolve compared to  
62 conflict over gene expression. However, functional  
63 studies have revealed that the genes underlying some  
64 dimorphisms are not expressed differently between the  
65 sexes (Khila *et al.*, 2012). This indicates that sex-biased  
66 expression alone cannot explain all dimorphism, and other  
67 mechanisms may exist.

68 Another perspective on the genetics of sexually  
69 dimorphic traits stems from investigations grounded in  
70 quantitative genetic theory (Lande, 1980). By comparing  
71 the phenotypes of individuals of known relatedness,  
72 usually through breeding designs or pedigrees, one can  
73 estimate the between-sex genetic correlation ( $r_{fm}$ ) for a  
74 trait of interest. This correlation describes the extent to  
75 which a particular genotype affects both male and female  
76 phenotypes in the same way. If  $r_{fm} \approx 1$ , genotypes affect  
77 males and females similarly (i.e. brothers and sisters look  
78 alike), while if  $r_{fm} \approx 0$ , male and female phenotypes vary  
79 independently (Lande, 1980). This estimate of  $r_{fm}$  is based  
80 on autosomal additive standing genetic variation and  
81 measures the additive effects of the many genetic variants  
82 that exist in that population at that time. It can therefore  
83 be used to predict the extent to which a population can  
84 respond to sexually divergent selection. Since this  $r_{fm}$   
85 estimate is based on the additive genetic variance, we will  
86 denote it here as  $r_{fm}^A$  for clarity.

87 Average estimates of  $r_{fm}^A$  are often close to one  
88 (Poissant *et al.*, 2010), suggesting that there is little  
89 standing sex-specific genetic variation. However, these

90 estimates are also interpreted by many to reflect the  
 91 extent to which the autosomal genetic architecture  
 92 underlying the trait is shared between the sexes  
 93 (Chenoweth *et al.*, 2008; Poissant *et al.*, 2010; Griffin *et al.*,  
 94 2013; e.g. Stewart & Rice, 2018). In other words, a strongly  
 95 positive  $r_{fm}^A$  is interpreted to mean that the gene network  
 96 that produces the phenotypic trait value is largely identical  
 97 between the sexes, suggesting that genetic architecture  
 98 needs to be decoupled before SD can evolve. Furthermore,  
 99 if  $r_{fm}^A$  is an evolutionary important constraint, one would  
 100 expect those traits with weak  $r_{fm}^A$  to be more likely to  
 101 evolve SD, resulting in a negative relationship  
 102 (Bonduriansky & Rowe, 2005; Fairbairn & Roff, 2006;  
 103 Poissant *et al.*, 2010). Alternatively, selection in favor of SD  
 104 may drive reductions in  $r_{fm}^A$ , leading to the same  
 105 prediction. This negative association is supported by the  
 106 prevailing evidence (Poissant *et al.*, 2010), however the  
 107 correlation varies widely between studies, and  $r_{fm}^A$  is

108 generally a poor predictor of SD. Furthermore,  $r_{fm}^A$  has  
 109 been shown to be quickly eroded under artificial selection  
 110 (Delph *et al.*, 2011).

111  $r_{fm}^A$  estimates provide a high-level statistical  
 112 description of genotype to phenotype mapping across the  
 113 sexes and are an aggregate across standing genetic  
 114 variation in the population. However, we know very little  
 115 about the loci that underlie this statistic. In particular, we  
 116 do not know whether variation in protein coding sequence  
 117 is more or less likely to cause sexually discordant  
 118 phenotypic effects than expression variation. Here, we use  
 119 high-throughput phenotype data from a genome-wide  
 120 panel of gene knock-outs in mice to reveal unexpected  
 121 differences in the gene expression architecture between  
 122 the sexes (The International Mouse Phenotyping  
 123 Consortium *et al.*, 2016; International Mouse Phenotyping  
 124 Consortium *et al.*, 2017). We find that although most  
 125 phenotypic traits are dimorphic, even many monomorphic

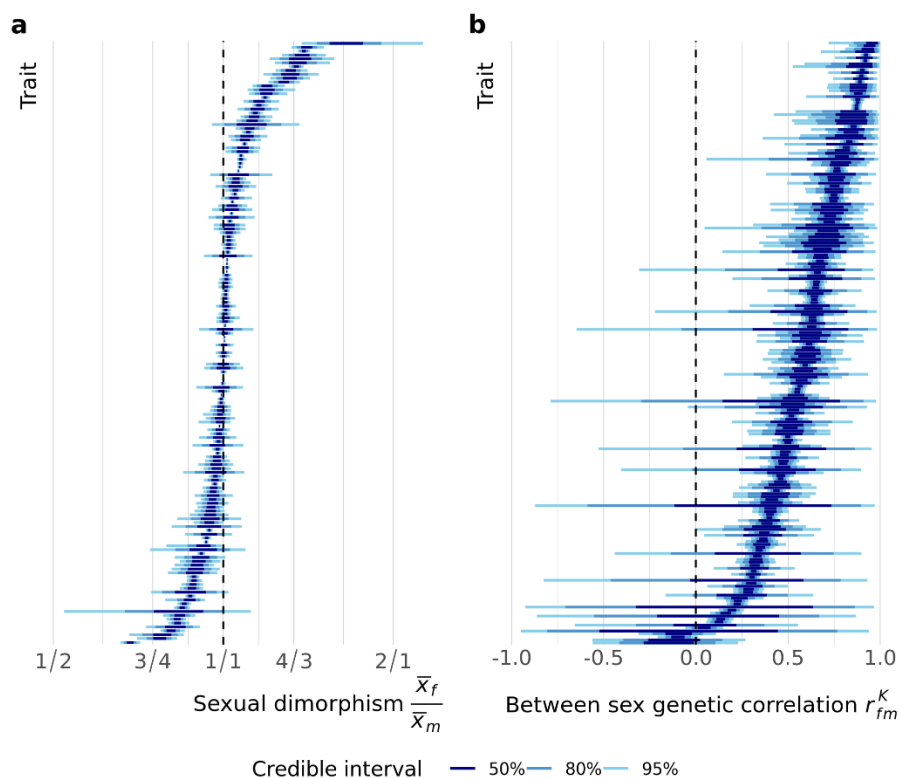

**Figure 1:** (a) Estimates and associated uncertainty for sexual dimorphism for each trait analyzed. Each horizontal line displays the credible intervals for one trait, where traits have been arranged by the posterior median. Shaded regions indicated the credible intervals of 50%, 80% and 95% of the posterior densities from a multilevel model. Sexual dimorphism is averaged across the wild-type genotypes, and defined as the ratio of female and male means. (b) As in (a), but depicting the between-sex genetic correlation  $r_{fm}^K$ . Note that the traits have been arranged independently in each panel.

126 traits harbor sex-dependent architectures, suggesting that  
127 many traits may harbor cryptic sex-specific variation.  
128 Changes in both sexes to these loci through expression  
129 may provide a way for SD to rapidly evolve, as traits are  
130 already partially decoupled and the phenotypic effect  
131 differs between males and females. These findings imply  
132 that the evolutionary constraint in SD may be more easily  
133 overcome than previously thought and explain the broad  
134 diversity of sexual dimorphism observed in nature, as well  
135 as the apparent rapid evolution of many sexually  
136 dimorphic traits.

## 137 Results

138 We evaluated the sex-specific effects of alterations to  
139 gene expression, by leveraging data from large-scale high-  
140 throughput phenotyping of gene knock-out lines from the  
141 International Mouse Phenotyping Consortium (IMPC) (The  
142 International Mouse Phenotyping Consortium *et al.*,  
143 2016). We obtained data for all continuous traits from the  
144 main IMPC pipeline for which at least 100 genotypes were  
145 available. The IMPC uses highly standardized phenotyping  
146 assays on C57BL/6 inbred mice. Both control mice and  
147 phenotype knock-out lines are tested continuously, with  
148 the eventual goal of knocking out each gene in the mouse  
149 genome. This immense scientific effort provides an  
150 unprecedented opportunity to quantify the between-sex  
151 genetic correlation across many traits and many genotypes  
152 in highly standardized conditions.

### 153 *Sexual dimorphism and $r_{fm}^K$ of mouse traits*

154 If males and females share the genetic architecture of  
155 traits, knock-outs should affect the phenotype of both  
156 sexes similarly, and as architectures diverge the knock-out  
157 effects should diverge as well. We estimated the genetic  
158 correlation between males and females analogous to the  
159 conventional approach outlined above ( $r_{fm}^A$ ). However, to

160 delineate the knock-out lines from the traditional  
161 approach, we denote these estimates as  $r_{fm}^K$ , where  $K$   
162 denotes the genetic variance-covariance matrix between  
163 knock-out genotypes (Figure S1). Note that  $r_{fm}^K$  measures  
164 the correlation between the phenotypic effects of genetic  
165 knock-outs, while  $r_{fm}^A$  measures the correlation for  
166 genome-wide additive genetic variance.

167 For each of 260 traits, we obtained all available  
168 observations. On average, traits were measured in 8,069  
169 control mice, as well as in 21,513 mice across 1,713  
170 different knock-out genotypes. Per knock-out line, seven  
171 females and seven males were typically phenotyped.

172 For each trait we obtained posterior distributions for  
173 SD and the between-sex genetic correlation ( $r_{fm}^K$ ) by fitting  
174 a Bayesian multilevel model. SD was expressed as the ratio  
175 of means (for Figure 1) and as the “sexual dimorphism  
176 index”:  $\frac{\bar{x}_{larger\ sex}}{\bar{x}_{smaller\ sex}} - 1$  (for downstream analyses). Since  
177 mice are sexually dimorphic for body size and many traits  
178 scale with body size, we included a standardized  
179 population level effect of body weight in the model.  
180 Models without body size adjustment produced  
181 qualitatively similar results (see supplementary material).  
182 Additionally, we added group level intercepts for known  
183 sources of variance, this included the phenotyping center,  
184 the date of testing, as well as variation in testing conditions  
185 indicated by the IMPC. Using a Bayesian approach allowed  
186 us to evaluate and propagate the uncertainty in the  
187 estimate of  $r_{fm}^K$  in downstream analyses. This can be  
188 important since this correlation can be biased towards 0 if  
189 it is difficult to estimate (Griffin *et al.*, 2013). Out of 260  
190 traits tested, 202 traits passed our model evaluation  
191 procedure and were used for further inference.

192 Many of the measured traits showed substantial SD  
193 (Figure 1a), confirming a previous report on the IMPC data  
194 (International Mouse Phenotyping Consortium *et al.*,  
195 2017), with an average SD index of 0.09 [0.08, 0.10]  
196 (posterior median [95% Credible Interval]). As the large  
197 sample size in this study makes it possible to distinguish  
198 small effects that have little biological relevance, we  
199 evaluated SD using equivalence testing (Wellek, 2010). We  
200 compared the 95% credible intervals (CI) of the SD index  
201 for each trait with a region of practical equivalence (ROPE)  
202 between 0 and 0.05 (Kruschke, 2018) (i.e. between 0 and  
203 5% difference in absolute magnitude). When the entire CI  
204 falls outside the ROPE, we can be confident the sexes differ  
205 by more than 5% and the trait is considered dimorphic. We  
206 consider a trait monomorphic if we are confident there is  
207 less than a 5% difference, so when the entire CI falls within  
208 the ROPE. Under this decision rule (Kruschke, 2018),  
209 dimorphic traits roughly equal monomorphic traits. 49 out  
210 of the 156 traits (31.4%) were found to be clearly

211 dimorphic, while 47 traits (30.1%) to be monomorphic. and  
212 60 traits (38.5%) were not classified, as their credible  
213 interval overlapped the 5% threshold. Some of the most  
214 monomorphic traits include calcium levels in the blood and  
215 the time spent on the periphery of an open field. Strongly  
216 dimorphic traits include a variety of immune function  
217 related traits, such as spleen weight and counts of  
218 different T-cell types, as well as glucose tolerance (Table  
219 S1).

220 Traits showed a wide variety of estimates for  $r_{fm}^K$ , from  
221 a correlation close to 1 between the phenotypes of the  
222 sexes down to correlations indistinguishable from 0 (Figure  
223 1b). The average correlation was clearly positive, but not  
224 as strong as we expected (0.650 [0.622, 0.689]).  
225 Surprisingly, very few traits showed a strong concordance  
226 between male and female effects, with fewer than 5% of  
227 traits having an estimate above 0.9. Some of the traits with  
228 the highest correlation are body temperature and eye

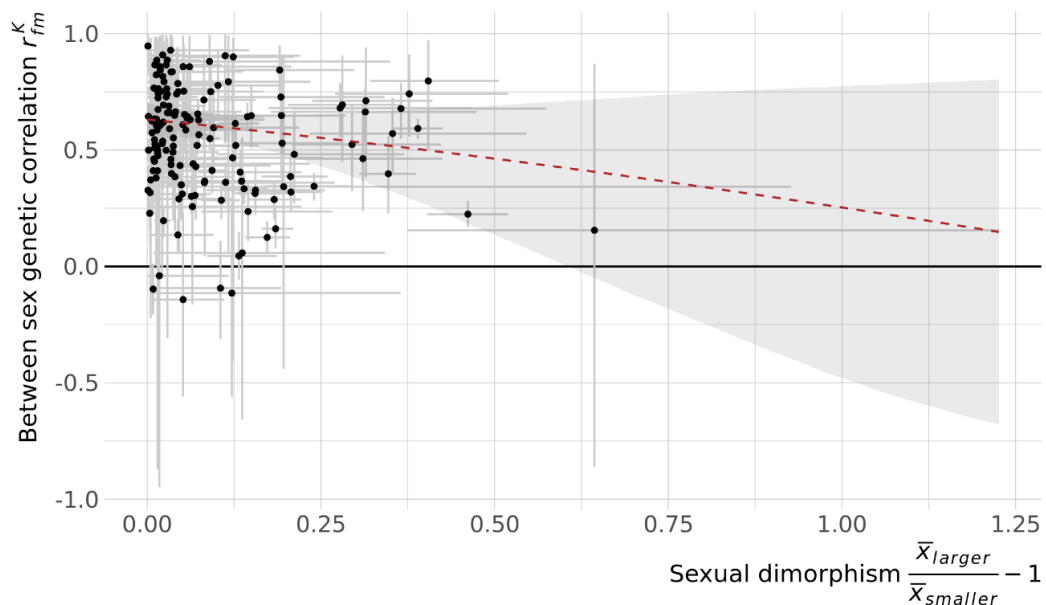

**Figure 2:** The between-sex genetic correlation does not depend on sexual dimorphism in the trait. Each point is a trait, with error bars indicating the 95% credible interval (CI) in the estimates. The red line represents the model fit of a linear model on the Fisher-transformed  $r_{fm}^K$ , with the shaded region indicating the 95% credible interval, including propagation of trait level uncertainty. Sexual dimorphism is expressed as the SD ratio.

229 morphology, while several immune phenotypes have a  
230 correlation close to 0 (Table S1).

231 To test the constraint that high  $r_{fm}^K$  places on the  
232 evolution of dimorphism, we assessed whether  $r_{fm}^K$  is  
233 lower for more dimorphic traits, which we would expect if  
234 dimorphism is more often associated with a reduced inter-  
235 sexual correlation. We fitted a linear model with Fisher-  
236 transformed  $r_{mf}^K$  values as the dependent variable and  
237 sexual dimorphism (expressed as the SD index),  
238 propagating the uncertainty in both variables from the  
239 trait-level models. Contrary to expectation, the between-  
240 sex genetic correlation is not associated with sexual  
241 dimorphism (Figure 2, slope: -0.49 [-1.34, 0.35]). Although  
242 there is a trend in the expected direction, the relationship  
243 is non-significant, and  $r_{fm}^K$  at monomorphism (i.e. the  
244 intercept) is only slightly higher than the overall average:  
245 0.630 [0.557, 0.698].

246 To investigate whether there were differences in the  
247 genetic architecture of dimorphism between trait types  
248 (Poissant *et al.*, 2010), we assigned each of the traits one  
249 of four categories: behavior, morphology, physiology or  
250 immunity (Table S1). We repeated the linear model  
251 regressing  $r_{mf}^K$  on SD, now including trait category and the  
252 SD:trait category interaction as additional parameters.  
253 There is no evidence that the relationship between  $r_{mf}^K$   
254 and SD is different for different trait categories (Figure S2).  
255 The average  $r_{mf}^K$  of trait categories, estimated at  
256 monomorphism, can also not clearly be distinguished  
257 (Figure S3).

258 Male and female genetic variances were often  
259 unbalanced, and there was a clear tendency for male  
260 genetic variance to be larger ( $\frac{V_{G(m)}}{V_{G(f)}} = 1.14 [1.04, 1.23]$ ).  
261 Thus, knock-out mutations have, on average, substantially  
262 larger phenotypic effects in males. It has been noted  
263 previously that mutations have larger fitness effects in

264 male *Drosophila* (Sharp & Agrawal, 2013), and differences  
265 in genetic variance between the sexes may contribute  
266 toward the evolution of dimorphism, even under a strong  
267 between-sex genetic correlation (Wyman & Rowe, 2014).  
268 However, we found no relation between the imbalance of  
269 sex-specific variances and the level of SD (slope: 0.03 [-  
270 0.26, 0.30]).

#### 271 *Development of size dimorphism and $r_{fm}^K$*

272 Body size is dimorphic in many species, including the  
273 mouse, yet it has been found numerous times that  $r_{fm}^G$  for  
274 this trait is close to 1 (Roff, 2012). Nonetheless, sexual size  
275 dimorphism can often be rapidly altered in response to the  
276 environment (Badyaev, 2002), making this an important  
277 trait to study in order to better understand the link  
278 between the evolution of SD and sex-specific  
279 architectures. As sexual size dimorphism (SSD) is  
280 established through variable development rates and  
281 times, it is especially useful to understand when in  
282 development the effect of body size loci diverges between  
283 the sexes. Unfortunately, there is very little data available  
284 for the development of  $r_{fm}^G$ , with studies usually including  
285 only 2 or 3 time points (Poissant & Coltman, 2009). In  
286 contrast, the IMPC measures body weight weekly from  
287 week 3 through 16, providing the opportunity to estimate  
288 when during development the effects of expression  
289 changes become sex-biased.

290 Using the same modelling approach described above,  
291 we obtained estimates for SSD and  $r_{fm}^K$  at each week  
292 (Figure 3). SSD increases strongly at the start of this period,  
293 more than doubling between weeks 3 and 7 (Figure 3a).  
294  $r_{fm}^K$  decreases during that same time (Figure 3b), and both  
295 parameters stabilize around 8 weeks. The two variables  
296 follow a roughly linear negative relationship during  
297 development (Figure 3c). A developmental link between  
298 SSD and  $r_{fm}^K$  may be the result of sexually antagonistic

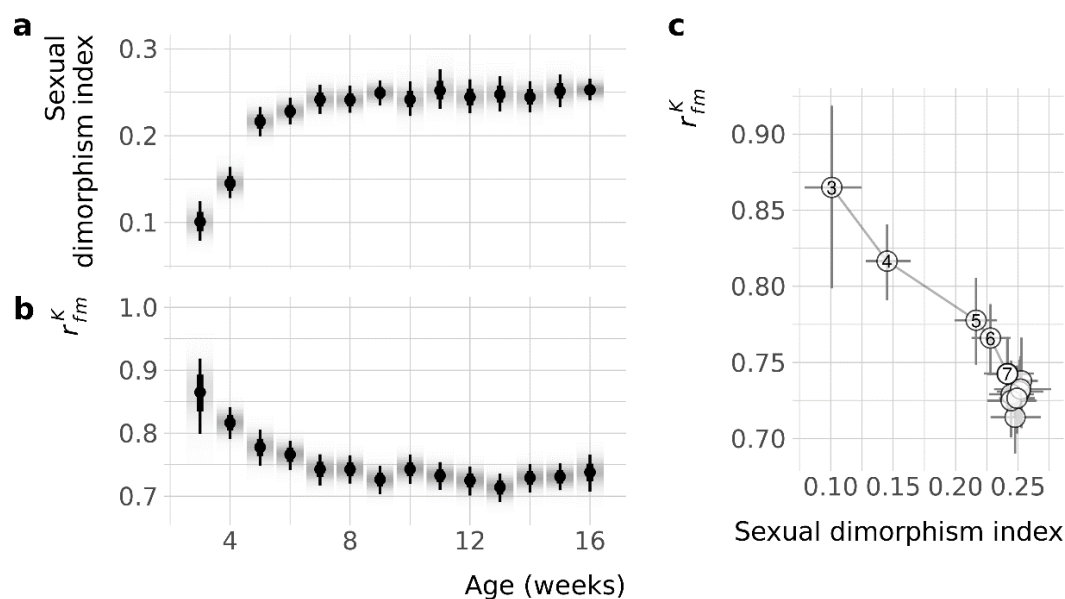

**Figure 3:** The between sex genetic correlation decreases as size dimorphism increases over development. (a) Estimates for sexual dimorphism in body mass for wildtype mice. Points indicate the posterior median with wide and narrow line segments denoting the 66% and 95% credible intervals respectively, and the density gradient represents the posterior density. (b) As in (a), but depicting the between sex genetic correlation. (c) Association of sexual size dimorphism and the  $r_{fm}^K$  during development. Points are posterior medians with 95% credible intervals, as in (a) and (b), with lines connecting subsequent week. Weeks 3 through 7 are numbered.

299 selection mainly acting in adulthood. This would bias sex-  
 300 specific loci to be expressed only later in development,  
 301 driving an increasing SSD and decreasing  $r_{fm}$ .  
 302 Alternatively, strong trait integration during early  
 303 development may pose significant constraints on the  
 304 divergence of the sexes before 6 weeks.

#### 305 *Identification of knock-out genotypes with sexually* 306 *discordant effects*

307 To gain insight into the extent to which sex-specific  
 308 architectures are shared between different traits, we  
 309 quantified to what extent knock-out genotypes have  
 310 consistent sexually concordant or discordant effects. We  
 311 separated the sexually concordant and discordant effect of  
 312 each genotype on a trait by projecting the estimated effect  
 313 (Best Linear Unbiased Predictor) along two independent  
 314 axes (Ruzicka *et al.*, 2019), the positive and negative

315 diagonal of a female vs male plot (as in Figure S1). Then, in  
 316 order to differentiate knockouts with strong versus weak  
 317 discordant effects, we looked for genotypes with a  
 318 consistently low or high ranking along the discordant axis.

319 We identified five knock-out genotypes that  
 320 consistently had smaller sexually discordant effects,  
 321 compared to other genotypes (Figure 4). Those five  
 322 genotypes also had much smaller concordant effects,  
 323 indicating that their phenotypes are consistently average.  
 324 Unsurprisingly, these were five wildtype genotypes.  
 325 Additionally, 24 genotypes had larger than average  
 326 discordant effects (Figure 4, Table S2). These genotypes  
 327 tended to affect the sexes differently, across many traits.  
 328 An analysis of Gene Ontologies for the genes that were  
 329 knocked out in these genotypes, revealed no significantly  
 330 overrepresented categories. In contrast to the 29

331 discordant genotypes, 292 genotypes (out of 2543) had  
332 consistently small or large concordant effects. This  
333 difference suggests that traits are more likely to genetically  
334 co-vary in their average value, rather than in their  
335 dimorphism.

#### 336 *Sex-biased gene expression and fertility*

337 Many investigations into the evolutionary significance  
338 of gene expression to SD have focused on sex-biased gene  
339 expression (Grath & Parsch, 2016). Of specific interest are  
340 expression differences in the gonads, where most sex-  
341 biased expression occurs. In these studies, it is often  
342 assumed that gonadal expression bias reflects important  
343 sex-specific fertility functions, however, it is usually not  
344 possible to verify this. Combining previously published  
345 gonadal expression data (Rinn *et al.*, 2004) with fertility

346 data from the IMPC database, however, allowed us to test  
347 whether the expression knock-out of sex-biased genes  
348 causes sex-specific infertility.

349 As predicted, fertility status was significantly  
350 associated with expression bias category (i.e. male-biased,  
351 female-biased or unbiased;  $\chi^2_6 = 76.6$ ,  $p < 0.001$ , Figure S4).  
352 Gene knockouts of female-biased or unbiased genes led to  
353 male-limited infertility in 1.5% of cases, but this increased  
354 to 11% of cases when knocking out male-biased genes.  
355 Female-limited fertility on the other hand was less  
356 common in general and showed no increase with knock-  
357 outs of female-biased genes (Figure S4), possibly because  
358 female gametogenesis is largely encoded during fetal  
359 development and then arrested.

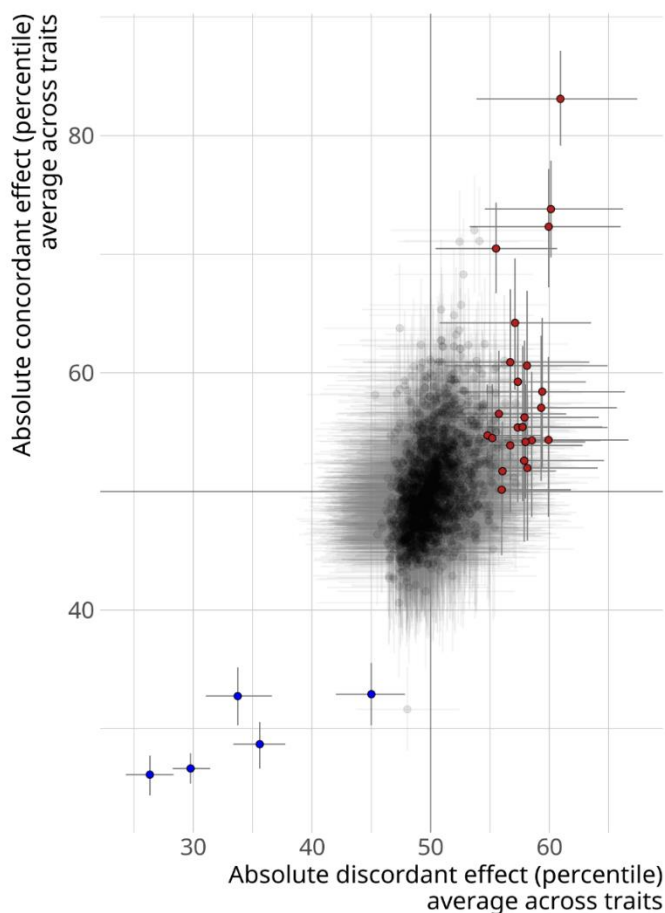

**Figure 4:** Identifying genotypes with consistent sexually discordant effects. Each point is a genotype, having been tested for at least 50 traits, with error bars denoting 95% credible intervals (CIs). The average percentile rank for the absolute sexually discordant effect of a genotype is plotted along the x-axis. The y-axis shows the average percentile rank for the absolute concordant effect. Red points indicate genotypes that tend to have more sexually discordant effects than other genotypes, while blue points are genotypes that have less discordant effects (CI does not overlap 50<sup>th</sup> percentile).



## 360 Discussion

361 Using the extensive phenotyping effort of gene knock-  
362 out mouse lines by the IMPC, we have tested for the extent  
363 of overlap in trait genetic architecture between males and  
364 females. Even in the mouse, which is relatively  
365 monomorphic when compared to many other vertebrates,  
366 it is surprisingly common for traits to show clear  
367 differences between the sexes after controlling for body  
368 size. This therefore suggests that sexual dimorphism is not  
369 the exception but the norm across many crucial somatic  
370 traits.

371 Furthermore, traits are affected differently by knock-  
372 out mutations depending on the sex of the individual. This  
373 clearly illustrates that studies of gene function must  
374 account for sex, as knock-out effects may only be easily  
375 detectable in one of the sexes (International Mouse  
376 Phenotyping Consortium *et al.*, 2017). Alterations in gene  
377 expression are often thought to be a common mechanism  
378 to resolve intra-locus sexual conflict by making gene  
379 expression sex-biased or sex-specific (Grath & Parsch,  
380 2016). This assumes a shared genetic architecture, which  
381 is differentially regulated between the sexes. Our work  
382 suggests that the underlying architecture may differ  
383 between the sexes in many cases, and the low estimates  
384 of  $r_{fm}^K$  that we recover highlight a different potential role  
385 of gene expression in the evolution of SD.

386 Mutations of large regulatory effect can often be  
387 expected to alter SD, providing one way to resolve intra-  
388 locus sexual conflict. However, these regulatory changes  
389 need not result in sex-biased gene expression, as our work  
390 suggests that regulatory changes in both sexes, in this case  
391 elimination of expression in both sexes through knockouts,  
392 often predominantly only affect the phenotype of one. In  
393 other words, sexually concordant regulatory changes can  
394 result in sexually discordant phenotypic effects, and our

395 results suggest that this commonly occurs. This provides  
396 an alternative route to dimorphism through sex-specific  
397 genetic architecture, rather than differential regulation of  
398 shared architecture. This could, for example, be the result  
399 of interactions with sex-biased genes in the same  
400 regulatory network, or of a sex-bias in the size of the cell  
401 populations expressing the gene. It appears likely that the  
402 modulation of gene expression, either through sex-bias in  
403 the downstream phenotypic effects or in the expression  
404 itself, is a major contributor to the evolution of SD.

405 Although mutations of large effect, especially gene  
406 deletions, can have deleterious effects on other traits  
407 through pleiotropy, many genes are non-essential  
408 (Amsterdam *et al.*, 2004; Liao & Zhang, 2007; Georgi *et al.*,  
409 2013). This suggests significant regulatory potential in the  
410 evolution of SD. Additionally, the knockout mutations  
411 assessed here likely represent an extreme form of  
412 regulatory variation, which we would expect to have  
413 similar, if less drastic, sex-specific effects, and more often  
414 contribute to SD.

415 As others have previously indicated (Cowley & Atchley,  
416 1988; Reeve & Fairbairn, 2001; Bonduriansky & Rowe,  
417 2005),  $r_{fm}^A$  may not be as strong an indicator of constraint  
418 as was originally suggested (Lande, 1980). While  $r_{fm}^A$  is  
419 very useful in describing the potential for the standing  
420 genetic variation to alter SD in a single or a few  
421 generations, it cannot detect decoupling in trait  
422 architectures which are currently lacking variation. Our  
423 results indicate that even high  $r_{fm}^A$  traits may be  
424 susceptible to changes in SD, as most traits have cryptic  
425 parts of the genetic architecture in which new mutations  
426 will likely have sex discordant effects. Importantly,  
427 changes in the architecture itself, such as changes in gene  
428 pathways or the recruitment of new transcription factors,

429 are not necessary to have occurred, contrasting with a  
430 common interpretation of a strong  $r_{fm}^A$ .

431 A potential limitation of this study is that the mice are  
432 inbred, resulting in genome-wide homozygosity. This  
433 means that the phenotypic variation is expected to be  
434 relatively small, making the effects of knockouts appear  
435 stronger. Additionally, the effects of dominance and  
436 epistasis are artificially limited. As it has been suggested  
437 that sex-specific dominance is pervasive (Grieshop &  
438 Arnqvist, 2018), and epistatic interactions could be  
439 affected by sex as well, our estimates of  $r_{fm}^K$  could  
440 potentially be biased upwards. It is also important to note  
441 that sex-linked genetic architecture can allow for the  
442 evolution of dimorphism. However, given the relatively  
443 small size and limited gene content of the mouse Y  
444 chromosome (Soh *et al.*, 2014), the role of the Y in sex-  
445 specific genetic architecture for a broad array of somatic  
446 traits is unclear.

447 The vast majority of genotypes were neither strongly  
448 nor weakly discordant across traits, suggesting there are  
449 very few or no “sex-specific genes” or “SD genes” but  
450 rather many different genes have sex-specific effects on  
451 different traits. The few genotypes that did show some  
452 consistently discordant effects had no functional  
453 categories in common, also suggesting that SD is regulated  
454 differently in different traits. As we identified more  
455 genotypes that had consistently large concordant effects,  
456 the genetic covariance between trait means is likely  
457 stronger than between SD of different traits. Large-scale  
458 analyses in a multivariate framework are needed to fully  
459 clarify the covariance of expression variance across traits  
460 and sex, in order to come to a complete understanding of  
461 the evolutionary constraints on SD.

462 In conclusion, using a dataset of unprecedented size,  
463 we have demonstrated that traits harbor a surprising  
464 amount of sex-specific genetic architecture, as sexes

465 respond variably to knock-out mutations. These results  
466 may help explain why SD is common, evolvable and  
467 variable, even under supposed strong genetic constraints.  
468 While these differences clearly indicate that the genotype-  
469 to-phenotype mapping is sex-dependent for most traits, it  
470 remains unclear what underlying mechanisms are the  
471 cause for this. We hope future work will help elucidate  
472 proximate causes and evolutionary consequences of this  
473 work.

## 474 Methods

475 We obtained data from the online IMPC genotype-  
476 phenotype database. We selected phenotypes for analysis  
477 by requesting all uni-dimensional continuous traits,  
478 excluding legacy pipelines. We also excluded traits that  
479 were not measured in both sexes, fitness-related traits  
480 (such as reproductive screening), body size (we analyzed  
481 body size separately), traits with fewer than 100  
482 genotypes, and traits that were clearly not actually  
483 continuous (such as a count of the number of ribs). After  
484 triage, we had 260 traits for which we downloaded all  
485 available phenotype data, including both knock-out  
486 phenotypes and control data. On average we obtained  
487 data for 8,069 control mice and 21,513 mice from 1,713  
488 knock-out lines, per trait.

489 Sexual dimorphism and  $r_{fm}^K$  of mouse traits

490 As we were interested in estimating a single value for  
491  $r_{fm}^K$  per trait, we collapsed different sources of genetic  
492 variance into genotypes. As some gene knock-outs were  
493 performed in different genetic backgrounds, some genes  
494 had multiple allelic knock-outs, and some genes were  
495 tested in different zygosity, we defined each unique  
496 gene:allele:background:zygosity combination as a  
497 separate genotype. Note that the genetic backgrounds are  
498 all C57BL/6 mice, but a different sub-strain.

499 To each of the trait datasets, we fitted a Bayesian linear  
 500 mixed model with the goal of estimating both the  
 501 between-sex genetic correlation ( $r_{fm}^K$ ) and sexual  
 502 dimorphism (SD). We opted for the analysis of single traits  
 503 as opposed to multivariate models, since phenotypes have  
 504 been measured across differing sets of individuals and  
 505 knock-outs. Additionally, the univariate models were  
 506 computationally expensive, with each model taking  
 507 several days to a week to fit, and multivariate models  
 508 would be logistically unfeasible. Each model had one of the  
 509 phenotypes as the dependent variable, which was  
 510 standardized (centered and scaled to unit variance) and  
 511 transformed (see below). We included sex as a population  
 512 level effect (also called fixed effect), allowing an average  
 513 level of dimorphism across genotypes, although we did not  
 514 directly use this parameter as our measurement of SD (see  
 515 below). We also included body mass as a population level  
 516 parameter, since mice are size dimorphic. Body mass was  
 517 standardized (centered and scaled to unit variance) prior  
 518 to analysis. All analyses were repeated without body mass,  
 519 and the qualitatively similar results can be found in the  
 520 supplementary material, although we only recommend  
 521 interpretation of the results accounting for body size.

522 To estimate  $r_{fm}^K$  we added group level parameters (also  
 523 called random effects) of genotype for each sex, and their  
 524 correlation. Finally, we added group level intercepts for  
 525 known sources of variation when they were present, which  
 526 were 1) the phenotyping center in which testing was  
 527 performed, a parameter encoding several methodological  
 528 differences (“meta group”), and 2) the date of testing. This  
 529 leads to the final model definition (in *lme4/brms* syntax):  
 530 *phenotype* ~ *weight* + *sex* + (*0* + *sex* | *genotype*) + (*1* |  
 531 *center*) + (*1* | *meta\_group*) + (*1* | *date*). In mathematical  
 532 notation, following Gelman & Hill (2006):

$$533 \text{ trait}_i \sim N(\alpha_{j[l],k[l],l[i],m[i]} + \beta_{\text{sex},j[l]}(\text{sex})$$

$$534 + \beta_3(\text{body mass}), \sigma^2)$$

$$535 \begin{pmatrix} \beta_{\text{female},j} \\ \beta_{\text{male},j} \end{pmatrix} \sim N \left( \begin{pmatrix} \mu_{\beta_{\text{female},j}} \\ \mu_{\beta_{\text{male},j}} \end{pmatrix}, \begin{pmatrix} \sigma_{\beta_{\text{female},j}}^2 & \rho_{\beta_{\text{female},j}\beta_{\text{male},j}} \\ \rho_{\beta_{\text{male},j}\beta_{\text{female},j}} & \sigma_{\beta_{\text{male},j}}^2 \end{pmatrix} \right)$$

536 for genotype  $j = 1, \dots, J$

$$537 \alpha_k \sim N(\mu_{\alpha_k}, \sigma_{\alpha_k}^2), \text{ for center } k = 1, \dots, K$$

$$538 \alpha_l \sim N(\mu_{\alpha_l}, \sigma_{\alpha_l}^2), \text{ for meta group } l = 1, \dots, L$$

$$539 \alpha_m \sim N(\mu_{\alpha_m}, \sigma_{\alpha_m}^2), \text{ for date } m = 1, \dots, M$$

540 Parameter values were estimated using the *brms*  
 541 (Bürkner, 2017, 2018) interface to the probabilistic  
 542 programming language Stan (Carpenter et al., 2017). We  
 543 used weakly informative prior distributions, with priors of  
 544  $N(0, 1)$  for the intercept and  $N(0, 2)$  for the effect of body  
 545 mass. For the group level standard deviations and residual  
 546 standard deviation we used the positive range of unit  
 547 student-t distributions with 5 degrees of freedom. Finally,  
 548 we used an LKJ prior with  $\eta = 1$  for  $r_{fm}^K$ , which is uniform  
 549 over the range -1 to 1. Posterior distributions were  
 550 obtained using Stan’s no-U-turn HMC sampler, with 2  
 551 chains of 8000 iterations, with the first 4000 used as warm-  
 552 up and discarded. We additionally set the max tree-depth  
 553 to 20 and the adapt delta parameter to 0.9. To evaluate  
 554 the ability of our models to accurately estimate the  
 555 between-sex genetic correlation, even though the sample  
 556 size for each genotype was limited, we performed a  
 557 simulation study (figure S7), confirming that our approach  
 558 recovers the true value for  $r_{fm}^K$ .

559 In order to satisfy the assumption of approximately  
 560 normal residuals, we preceded each analysis by estimation  
 561 of a Box-Cox transformation, following the established  
 562 methods by the IMPC (Kurbatova et al., 2019), using the  
 563 simplified model definition: *phenotype* ~ *weight* + *sex* + (*0*

564 + sex | genotype). We estimated the transform using the  
565 *bcnPower* method in the *car* package (Fox *et al.*, 2019),  
566 with model fitting performed by *lme4* (Bates *et al.*, 2015).

567 After fitting all 260 trait models, we performed model  
568 criticism. For each model we obtained the maximum  $\hat{R}$   
569 parameter, the number of divergences and the minimum  
570 effective sample size. We removed all models that had a  
571 maximum  $\hat{R}$  of more than 1.05, more than 2.5% divergent  
572 draws, or a minimum effective sample size of less than  
573 400. Finally, we performed visual posterior predictive  
574 checks (Gabry *et al.*, 2019), and removed models that did  
575 not reproduce the observed data distribution. Considering  
576 the computational effort required for each of these  
577 models, as well as that the number of successful models  
578 was more than large enough for the analyses we wished to  
579 perform, we did not attempt to remedy the failing models.  
580 We performed visual checks to confirm that the excluded  
581 traits did not have a bias in SD or  $r_{fm}^K$ . After model  
582 criticism, 202 out of 260 models remained.

583 For each of these models we derived posterior  
584 distributions of  $r_{fm}^K$ . Note that *brms* estimates standard  
585 deviations and correlations directly, so no parameter  
586 transformation was necessary. We then derived posterior  
587 distributions of SD by predicting average male and female  
588 phenotypes for wildtype (i.e. control group) mice. When  
589 there were multiple genetic background variations in  
590 which a trait was tested, we used the marginal means  
591 across backgrounds. To make SD estimates comparable  
592 across traits, we used a mean standardized effect size for  
593 SD, the SD index:  $\frac{\bar{x}_{larger\ sex}}{\bar{x}_{smaller\ sex}} - 1$ , i.e. the ratio between  
594 larger and smaller, divided by the residual standard  
595 deviation. Note that the SD index requires that  
596 comparisons to zero are biologically meaningful (i.e. traits  
597 are measured on a ratio scale), which was not true for all  
598 the traits in our data set, such as body temperature,

599 indices and fractional measures. We therefore performed  
600 back transformations of the marginal means to the original  
601 scale, and we only calculated SD for 156 out of 202 traits.

602 After obtaining the posteriors for each trait, we used a  
603 linear model to test for a relationship between  $r_{fm}^K$  and SD.  
604 In order to account for uncertainty in those estimates we  
605 performed random draws from the posterior distributions  
606 of those estimates to create 500 datasets. For each of  
607 those samples we ran one MCMC chain of a  $Zr_{fm}^K \sim SD$   
608 *index* model using the *brm\_multiple* function, and  
609 performed inference on the combined set of 500 chains.  
610 Note that we performed a Z-transformation on  $r_{fm}^K$ , also  
611 called the Fisher transformation, to stabilize the variance.  
612 Additionally, we performed the same procedure for the  
613 ratio of the genetic variances:  $\frac{V_G(larger)}{V_G(smaller)}$ , which was log  
614 transformed before analysis.

#### 615 *Development of size dimorphism and $r_{fm}^K$*

616 To quantify sexual size dimorphism during  
617 development, and associated changes in  $r_{fm}^K$ , we split the  
618 body mass data into different ages. Mice were weighed  
619 once a week, with most mice being measured between 4  
620 and 16 weeks of age. For each week, we ran the same  
621 analysis as for the separate traits outlined above.

#### 622 *Identification of knock-out genotypes with sexually 623 discordant effects*

624 The concordant and discordant nature of knock-out  
625 genotypes was determined by evaluating whether the  
626 genotypes were consistently ranked low or high along the  
627 concordant and discordant axes across traits. For each  
628 trait, we used the multilevel model that was used to  
629 estimate SD and  $r_{fm}^K$ , described above, to obtain estimates  
630 of the male and female trait values for the measured  
631 genotypes. We extracted the posteriors for the male and  
632 female parameter for the genotype group term (BLUP).  
633 Note that these estimates are adjusted for body weight

634 and environmental effects, have already undergone  
635 parameter shrinkage, and are centered around zero. We  
636 then translated the male and female phenotypes into  
637 concordant and discordant effects, by rotating the axes so  
638 that the concordant axis is the positive diagonal (female =  
639 male) and the discordant axis is the negative diagonal  
640 (female = -male). The absolute value along the two  
641 diagonal axes was taken, so that the effect of a genotype  
642 is larger when it is further from the population average.  
643 Since the size of the discordant effects of a genotype is  
644 strongly affected by the trait architecture (i.e.  $r_{mf}^K$ ), we  
645 assigned genotypes percentile ranks to aid comparison  
646 across traits.

647 For all genotypes that were tested for at least 100  
648 phenotypes, we then calculated the average concordant  
649 and discordant rank across traits. Credible intervals (CIs)  
650 for this average were calculated by computing that  
651 average for 100 random draws of the posteriors. We then  
652 categorized genotypes as less or more discordant than  
653 average by checking whether the CI overlapped a median  
654 rank (50<sup>th</sup> percentile in Figure 4).

655 For the genotypes that were more discordant than  
656 average, we extracted which gene had been knocked out  
657 and analyzed the associated gene ontology (GO) terms.  
658 Using *goseq* (Young *et al.*, 2010) we tested for  
659 overrepresented GO terms, using the hypergeometric  
660 method for obtaining p-values. Finally, we adjusted the p-  
661 values to control the false discovery rate (Benjamini &  
662 Hochberg, 1995).

### 663 *Sex-biased gene expression and fertility*

664 We obtained published gene expression profiles of  
665 male and female gonadal tissue from the ArrayExpress  
666 database under accession number E-GEOD-1148 (Rinn *et al.*,  
667 2004). Using *limma* (Ritchie *et al.*, 2015), we calculated  
668 the difference in expression between the sexes (log<sub>2</sub> fold

669 change), and empirical Bayes moderated t-statistics with  
670 adjusted p-values. We then classified genes as sex-biased  
671 if the fold-change was at least 2, and the adjusted p-values  
672 was significant ( $\alpha = 0.05$ ). Genes that did not satisfy both  
673 those criteria were categorized as unbiased.

674 We then obtained female and male specific fertility  
675 data from the IMPC (phenotypes IMPC\_FER\_019\_001 and  
676 IMPC\_FER\_001\_001), which are binary traits (fertile vs.  
677 infertile) where each sex has been allowed to breed with a  
678 wildtype mate. Combining these we defined four fertility  
679 categories: fertile, female-limited infertile, male-limited  
680 infertile and infertile. To test for an association between  
681 gene expression category and fertility outcome after  
682 knock-out, we performed a 3x4 chi-squared test for  
683 independence.

### 684 Software

685 All analyses were performed in R v3.6.1 (R Core Team,  
686 2019). Specific R packages used in the analyses are listed  
687 above, and the *tidyverse* (Wickham *et al.*, 2019) was used  
688 for general data handling and visualization.

## 689 References

- 690 Amsterdam, A., Nissen, R.M., Sun, Z., Swindell, E.C.,  
691 Farrington, S. & Hopkins, N. 2004. Identification  
692 of 315 Genes Essential for Early Zebrafish  
693 Development. *Proc. Natl. Acad. Sci. U. S. A.* **101**:  
694 12792–12797.
- 695 Bachtrog, D., Mank, J.E., Peichel, C.L., Kirkpatrick, M., Otto,  
696 S.P., Ashman, T.-L., *et al.* 2014. Sex  
697 Determination: Why So Many Ways of Doing It?  
698 *PLoS Biol.* **12**: e1001899.
- 699 Badyaev, A.V. 2002. Growing apart: an ontogenetic  
700 perspective on the evolution of sexual size  
701 dimorphism. *Trends Ecol. Evol.* **17**: 369–378.
- 702 Bates, D., Mächler, M., Bolker, B. & Walker, S. 2015. Fitting  
703 Linear Mixed-Effects Models Using lme4. *J. Stat.*  
704 *Softw.* **67**: 1–48.

- 705 Benjamini, Y. & Hochberg, Y. 1995. Controlling the False  
706 Discovery Rate: A Practical and Powerful  
707 Approach to Multiple Testing. *J. R. Stat. Soc. Ser.  
708 B Methodol.* **57**: 289–300.
- 709 Bonduriansky, R. & Rowe, L. 2005. Intralocus Sexual  
710 Conflict and the Genetic Architecture of Sexually  
711 Dimorphic Traits in *Prochyliza Xanthostoma*  
712 (diptera: Piophilidae). *Evolution* **59**: 1965–1975.
- 713 Bürkner, P.-C. 2018. Advanced Bayesian Multilevel  
714 Modeling with the R Package brms. *R J.* **10**: 395–  
715 411.
- 716 Bürkner, P.-C. 2017. brms: An R Package for Bayesian  
717 Multilevel Models Using Stan. *J. Stat. Softw.* **80**:  
718 1–28.
- 719 Carpenter, B., Gelman, A., Hoffman, M.D., Lee, D.,  
720 Goodrich, B., Betancourt, M., *et al.* 2017. Stan: A  
721 Probabilistic Programming Language. *J. Stat.  
722 Softw.* **76**.
- 723 Chenoweth, S.F., Rundle, H.D. & Blows, M.W. 2008.  
724 Genetic Constraints and the Evolution of Display  
725 Trait Sexual Dimorphism by Natural and Sexual  
726 Selection. *Am. Nat.* **171**: 22–34.
- 727 Cheverud, J.M., Vaughn, T.T., Pletscher, L.S., Peripato, A.C.,  
728 Adams, E.S., Erikson, C.F., *et al.* 2001. Genetic  
729 architecture of adiposity in the cross of LG/J and  
730 SM/J inbred mice. *Mamm. Genome* **12**: 3–12.
- 731 Cowley, D.E. & Atchley, W.R. 1988. Quantitative Genetics  
732 of *Drosophila Melanogaster*. II. Heritabilities and  
733 Genetic Correlations between Sexes for Head and  
734 Thorax Traits. *Genetics* **119**: 421–433.
- 735 Cowley, D.E., Atchley, W.R. & Rutledge, J.J. 1986.  
736 Quantitative Genetics of *Drosophila*  
737 *Melanogaster*. I. Sexual Dimorphism in Genetic  
738 Parameters for Wing Traits. *Genetics* **114**: 549–  
739 566.
- 740 Delph, L.F., Steven, J.C., Anderson, I.A., Herlihy, C.R. & Iii,  
741 E.D.B. 2011. Elimination of a Genetic Correlation  
742 Between the Sexes Via Artificial Correlational  
743 Selection. *Evolution* **65**: 2872–2880.
- 744 Ellegren, H. & Parsch, J. 2007. The evolution of sex-biased  
745 genes and sex-biased gene expression. *Nat. Rev.  
746 Genet.* **8**: 689–698.
- 747 Fairbairn, D.J. & Roff, D.A. 2006. The quantitative genetics  
748 of sexual dimorphism: assessing the importance  
749 of sex-linkage. *Heredity* **97**: 319–328.
- 750 Fox, J., Weisberg, S., Price, B., Adler, D., Bates, D., Baud-  
751 Bovy, G., *et al.* 2019. *car: Companion to Applied*  
752 *Regression*.
- 753 Gabry, J., Simpson, D., Vehtari, A., Betancourt, M. &  
754 Gelman, A. 2019. Visualization in Bayesian  
755 workflow. *J. R. Stat. Soc. Ser. A Stat. Soc.* **182**:  
756 389–402.
- 757 Galouzis, C.C. & Prud'homme, B. 2021. Transvection  
758 regulates the sex-biased expression of a fly X-  
759 linked gene. *Science* **371**: 396–400. American  
760 Association for the Advancement of Science.
- 761 Gelman, A. & Hill, J. 2006. Data Analysis Using Regression  
762 and Multilevel/Hierarchical Models. Cambridge  
763 University Press.
- 764 Georgi, B., Voight, B.F. & Bucan, M. 2013. From mouse to  
765 human: evolutionary genomics analysis of human  
766 orthologs of essential genes. *PLoS Genet.* **9**.
- 767 Grath, S. & Parsch, J. 2016. Sex-Biased Gene Expression.  
768 *Annu. Rev. Genet.* **50**: 29–44.
- 769 Grieshop, K. & Arnqvist, G. 2018. Sex-specific dominance  
770 reversal of genetic variation for fitness. *PLOS Biol.*  
771 **16**: e2006810.
- 772 Griffin, R.M., Dean, R., Grace, J.L., Ryden, P. & Friberg, U.  
773 2013. The Shared Genome Is a Pervasive  
774 Constraint on the Evolution of Sex-Biased Gene  
775 Expression. *Mol. Biol. Evol.* **30**: 2168–2176.
- 776 Hanrahan, J.P. & Eisen, E.J. 1973. Sexual dimorphism and  
777 direct and maternal genetic effects on body  
778 weight in mice. *Theor. Appl. Genet.* **43**: 39–45.
- 779 Hansen, T.F. 2006. The Evolution of Genetic Architecture.  
780 *Annu. Rev. Ecol. Evol. Syst.* **37**: 123–157.
- 781 Hermansen, J.S., Starrfelt, J., Voje, K.L. & Stenseth, N.C.  
782 2018. Macroevolutionary consequences of sexual  
783 conflict. *Biol. Lett.* **14**: 20180186.
- 784 International Mouse Phenotyping Consortium, Karp, N.A.,  
785 Mason, J., Beaudet, A.L., Benjamini, Y., Bower, L.,  
786 *et al.* 2017. Prevalence of sexual dimorphism in  
787 mammalian phenotypic traits. *Nat. Commun.* **8**.

- 788 Khila, A., Abouheif, E. & Rowe, L. 2012. Function,  
789 Developmental Genetics, and Fitness  
790 Consequences of a Sexually Antagonistic Trait.  
791 *Science* **336**: 585–589. American Association for  
792 the Advancement of Science.
- 793 Kruschke, J.K. 2018. Rejecting or Accepting Parameter  
794 Values in Bayesian Estimation. *Adv. Methods*  
795 *Pract. Psychol. Sci.* **1**: 270–280.
- 796 Kurbatova, N., Karp, N., Mason, J. & Haselimashhadi, H.  
797 2019. *PhenStat: Statistical analysis of phenotypic*  
798 *data*. Bioconductor version: Release (3.10).
- 799 Lande, R. 1980. Sexual dimorphism, sexual selection and  
800 adaptation in polygenic characters. *Evolution* **34**:  
801 292–305.
- 802 Liao, B.-Y. & Zhang, J. 2007. Mouse duplicate genes are as  
803 essential as singletons. *Trends Genet.* **23**: 378–  
804 381.
- 805 Mank, J.E. 2017. The transcriptional architecture of  
806 phenotypic dimorphism. *Nat. Ecol. Evol.* **1**: 1–7.  
807 Nature Publishing Group.
- 808 Owens, I.P.F. & Hartley, I.R. 1998. Sexual dimorphism in  
809 birds: why are there so many different forms of  
810 dimorphism? *Proc. R. Soc. Lond. B Biol. Sci.* **265**:  
811 397–407.
- 812 Poissant, J. & Coltman, D.W. 2009. The ontogeny of cross-  
813 sex genetic correlations: an analysis of patterns. *J.*  
814 *Evol. Biol.* **22**: 2558–2562.
- 815 Poissant, J., Wilson, A.J. & Coltman, D.W. 2010. Sex-  
816 specific genetic variance and the evolution of  
817 sexual dimorphism: a systematic review of cross-  
818 sex genetic correlations. *Evolution* **64**: 97–107.
- 819 R Core Team. 2019. *R: A Language and Environment for*  
820 *Statistical Computing*. R Foundation for Statistical  
821 Computing, Vienna, Austria.
- 822 Reeve, J.P. & Fairbairn, D.J. 2001. Predicting the evolution  
823 of sexual size dimorphism. *J. Evol. Biol.* **14**: 244–  
824 254.
- 825 Rice, W.R. & Chippindale, A.K. 2001. Intersexual  
826 ontogenetic conflict. *J. Evol. Biol.* **14**: 685–693.
- 827 Rinn, J.L., Rozowsky, J.S., Laurenzi, I.J., Petersen, P.H., Zou,  
828 K., Zhong, W., *et al.* 2004. Major Molecular  
829 Differences between Mammalian Sexes Are  
830 Involved in Drug Metabolism and Renal Function.  
831 *Dev. Cell* **6**: 791–800.
- 832 Ritchie, M.E., Phipson, B., Wu, D., Hu, Y., Law, C.W., Shi,  
833 W., *et al.* 2015. limma powers differential  
834 expression analyses for RNA-sequencing and  
835 microarray studies. *Nucleic Acids Res.* **43**: e47–  
836 e47.
- 837 Roff, D.A. 2012. *Evolutionary Quantitative Genetics*.  
838 Springer Science & Business Media.
- 839 Ruzicka, F., Hill, M.S., Pennell, T.M., Flis, I., Ingleby, F.C.,  
840 Mott, R., *et al.* 2019. Genome-wide sexually  
841 antagonistic variants reveal long-standing  
842 constraints on sexual dimorphism in fruit flies.  
843 *PLOS Biol.* **17**: e3000244.
- 844 Sharp, N.P. & Agrawal, A.F. 2013. Male-biased fitness  
845 effects of spontaneous mutation in drosophila  
846 melanogaster. *Evolution* **67**: 1189–1195.
- 847 Soh, Y.Q.S., Alföldi, J., Pyntikova, T., Brown, L.G., Graves,  
848 T., Minx, P.J., *et al.* 2014. Sequencing the Mouse  
849 Y Chromosome Reveals Convergent Gene  
850 Acquisition and Amplification on Both Sex  
851 Chromosomes. *Cell* **159**: 800–813.
- 852 Stewart, A.D. & Rice, W.R. 2018. Arrest of sex-specific  
853 adaptation during the evolution of sexual  
854 dimorphism in *Drosophila*. *Nat. Ecol. Evol.* **2**:  
855 1507–1513.
- 856 The International Mouse Phenotyping Consortium,  
857 Dickinson, M.E., Flenniken, A.M., Ji, X., Teboul, L.,  
858 Wong, M.D., *et al.* 2016. High-throughput  
859 discovery of novel developmental phenotypes.  
860 *Nature* **537**: 508–514.
- 861 Wellek, S. 2010. Testing statistical hypotheses of  
862 equivalence and noninferiority. Chapman and  
863 Hall/CRC.
- 864 Wickham, H., Averick, M., Bryan, J., Chang, W., McGowan,  
865 L., François, R., *et al.* 2019. Welcome to the  
866 Tidyverse. *J. Open Source Softw.* **4**: 1686.
- 867 Wyman, M.J. & Rowe, L. 2014. Male Bias in Distributions  
868 of Additive Genetic, Residual, and Phenotypic  
869 Variances of Shared Traits. *Am. Nat.* **184**: 326–  
870 337.

871 Young, M.D., Wakefield, M.J., Smyth, G.K. & Oshlack, A.  
872 2010. Gene ontology analysis for RNA-seq:  
873 accounting for selection bias. *Genome Biol.* **11**:  
874 R14.

875

## 876 Acknowledgements

877 We gratefully acknowledge support from a  
878 Canada 150 Research Chair and the European  
879 Research Council (grant agreement 680951). We  
880 thank Locke Rowe, Michael Whitlock and members of  
881 the Mank Lab for helpful comments and suggestions.  
882 Finally, we are indebted to all contributors to the  
883 IMPC project and their commitment to open science.

## 884 Author Contributions

885 Both authors conceived of the study, WvdB  
886 performed the data analysis, and both authors wrote  
887 the manuscript.

901

## 888 Competing Interests statement

889 The authors declare they have no competing  
890 interests.

## 891 Data Availability Statement

892 No new data was collected for this study. All raw  
893 phenotype data is available from the International  
894 Mouse Phenotyping Consortium  
895 (<https://www.mousephenotype.org/>). The gene  
896 expression profiles of male and female gonadal tissue  
897 is available from the ArrayExpress database under  
898 accession number E-GEOD-1148. All estimates used in  
899 down-stream analyses are available in the  
900 Supplementary Information.
